# Supplementary material for: Differences in the Vertical Distribution of Aerosols, Nitrogen Dioxide, and Formaldehyde between Islands and Inland Areas: A Case Study in the Yangtze River Delta of China
Source: MDPI journal article supplement (doi:10.3390/rs15235475), 2023-11-23
Supplement: s1 [file s1]

## Supplement

### Differences in the vertical distribution of aerosols, nitrogen dioxide and formaldehyde between islands and inland areas: A case study in the Yangtze River Delta of China

Jinping Ou<sup>1</sup>, Qihou Hu<sup>2</sup>, Chengzhi Xing<sup>2\*</sup>, Yizhi Zhu<sup>3</sup>, Jiaxuan Feng<sup>4</sup>, Xiangguang Ji<sup>5</sup>, Mingzhu Zhang<sup>6</sup>, Xinqi Wang<sup>7</sup>, Liyuan Li<sup>8</sup>, Ting Liu<sup>9</sup>, Bowen Chang<sup>4</sup>, Qihua Li<sup>4</sup>, Hao Yin<sup>10</sup>, Cheng Liu<sup>10, 2, 11, 12</sup>

- <sup>1</sup> The Department of Health Promotion and Behavioral Sciences, School of Public Health, Anhui Medical University, Hefei 230032, China; 2022500101@ahmu.edu.cn (J.O.)
- <sup>2</sup> Key Lab of Environmental Optics and Technology, Anhui Institute of Optics and Fine Mechanics, Hefei Institutes of Physical Science, Chinese Academy of Sciences, Hefei 230031, China; qihu@aiiofm.ac.cn (Q.H.); xingcz@aiiofm.ac.cn (C.X.)
- <sup>3</sup> School of Environmental Science and Engineering, Suzhou University of Science and Technology, Suzhou 215009, China; yzz2017@mail.ustc.edu.cn (Y.Z.)
- <sup>4</sup> Institute of Physical Science and Information Technology, Anhui University, Hefei 230601, China; q20301206@stu.ahu.edu.cn (J.F.)
- <sup>5</sup> Anhui Provincial Academy of Eco-Environmental Science Research, Hefei 230071, China; q18101007@stu.ahu.edu.cn (X.W.)
- <sup>6</sup> Information Materials and Intelligent Sensing Laboratory of Anhui Province, Anhui University, Hefei 230601, China; xgji2017@mail.ustc.edu.cn (X.J.)
- <sup>7</sup> School of Environmental Science and Optoelectronic Technology, University of Science and Technology of China, Hefei 230026, China; linhua@mail.ustc.edu.cn (H.L.)
- <sup>8</sup> Department of Precision Machinery and Precision Instrumentation, University of Science and Technology of China, Hefei 230026, China; chliu81@ustc.edu.cn (C.L.); yhyh95@mail.ustc.edu.cn (H.Y.)
- <sup>9</sup> Center for Excellence in Regional Atmospheric Environment, Institute of Urban Environment, Chinese Academy of Sciences, Xiamen 361021, China
- <sup>10</sup> Key Laboratory of Precision Scientific Instrumentation of Anhui Higher Education Institutes, University of Science and Technology of China, Hefei 230026, China
- \* Correspondence: xingcz@aiiofm.ac.cn

**\*Corresponding author.** Key Lab of Environmental Optics and Technology, Anhui Institute of Optics and Fine Mechanics, Hefei Institutes of Physical Science, Chinese Academy of Sciences, Hefei 230031, China.

### **S1. WRF model configuration**

The weather research and forecast (WRF) model is a tool widely used in the atmospheric science community. WRF version 4.0 was used to simulate the meteorological parameters from May 6 to July 18, 2019. The center of the model domain is 105°E, 38°N, and the grid resolution is 10 km×10 km. The initial conditions and boundary conditions of the simulated weather field use the 6-hour final global analysis data generated by National Environmental Prediction Center (NCEP) with a spatial resolution of 1°×1°. The detailed information of the model configuration options can be found in Table S1 and our previous research [1, 2].

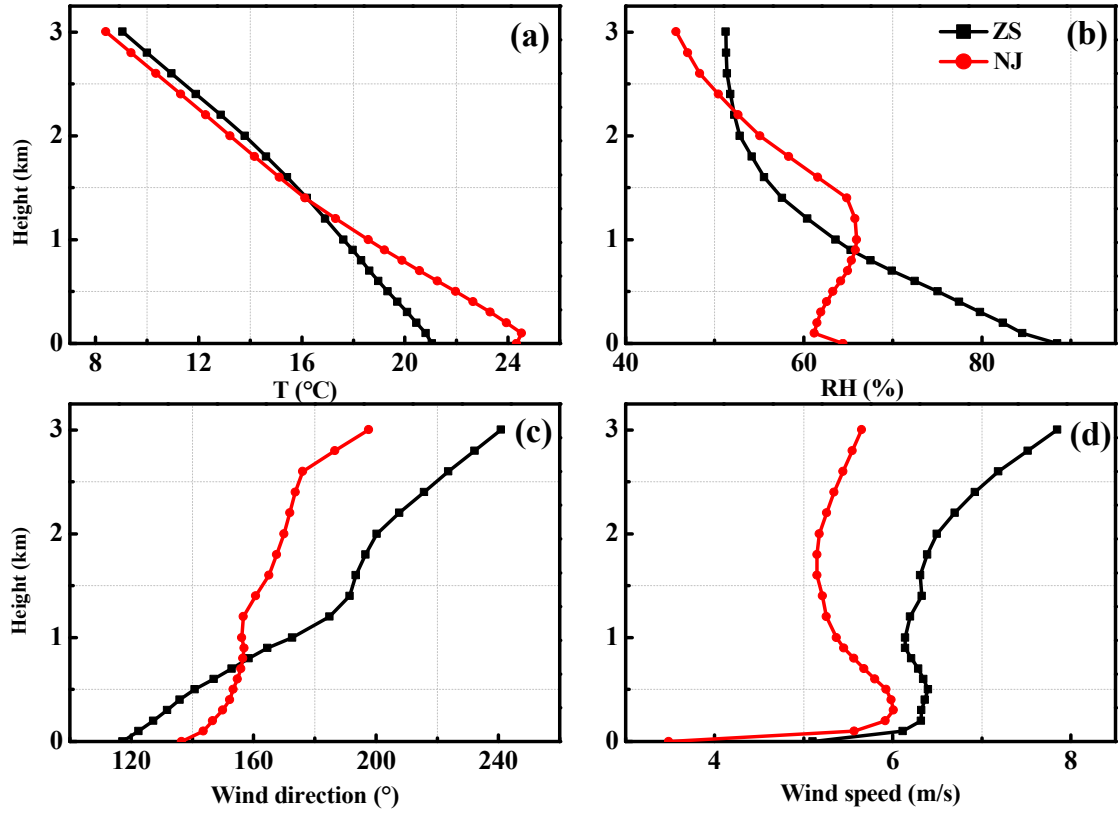

**Figure. S1** The averaged vertical profiles of (a) T, (b) RH, (c) WD and (d) WS from May to July 2019.

**Table S1** Parametric scheme of physical process in WRF model.

| Option                   | Parameterization scheme |
|--------------------------|-------------------------|
| Microphysics             | Lin et al. [3]          |
| Long-wave radiation      | RRTMG [4]               |
| Short-wave radiation     | RRTMG [4]               |
| Land-surface             | Noah [5]                |
| Planetary boundary layer | YSU [4]                 |
| Cumulus parameterization | Grell–Deveny [6]        |

## References

1. Liu, H.; Liu, C.; Xie, Z.; Li, Y.; Huang, X.; Wang, S.; Xu, J.; Xie, P. A. Paradox for Air Pollution Controlling in China Revealed by “APEC Blue” and “Parade Blue.” *Sci. Rep.* **2016**, *6*, 34408, DOI:10.1038/srep34408.
2. Ou, J.; Hu, Q.; Liu, H.; Hong, Q.; Xing, C.; Tan, W.; Lin, H.; Wang, X.; Xu, H.; Zhu, P.; et al. Vertical Characterization and Potential Sources of Aerosols in Different Seasons over the Yangtze River Delta Using Ground-Based MAX-DOAS. *Environ. Pollut.* **2021**, *279*, 116898. <https://doi.org/10.1016/j.envpol.2021.116898>.
3. Lin, Y.L.; Farley, R.D.; Orville, H.D. Bulk parameterization of the snow field in a cloud model. *Journal of Applied Meteorology*, **1983**, *22*, 1065-1092.
4. Mlawer, E.J.; Taubman, S.J.; Brown, P.D.; Iacono, M.J.; Clough, S.A. Radiative Transfer for Inhomogeneous Atmospheres: RRTM, a Validated Correlated-k Model for the Longwave. *J. Geophys. Res.* **1997**, *102*, 16663–16682, DOI:10.1029/97JD00237.
5. Ek, M.B.; Mitchell, K.E.; Lin, Y.; Rogers, E.; Grunmann, P.; Koren, V.; Gayno, G.; Tarpley, J.D. Implementation of Noah Land Surface Model Advances in the National Centers for Environmental Prediction Operational Mesoscale Eta Model. *J. Geophys. Res.* **2003**, *108*, 2002JD003296, DOI:10.1029/2002JD003296.
6. Grell, G.A.; Dévényi, D. A. Generalized Approach to Parameterizing Convection Combining Ensemble and Data Assimilation Techniques: PARAMETERIZING CONVECTION COMBINING ENSEMBLE AND DATA ASSIMILATION TECHNIQUES. *Geophys. Res. Lett.* **2002**, *29*, 38-1-38-4, DOI:10.1029/2002GL015311.
